# Supplementary material for: Reconstruction of the ancestral marsupial karyotype from comparative gene maps
Source: PubMed Central journal article supplement (PMC4222502; doi:10.1186/1471-2148-13-258), 2013-11-21

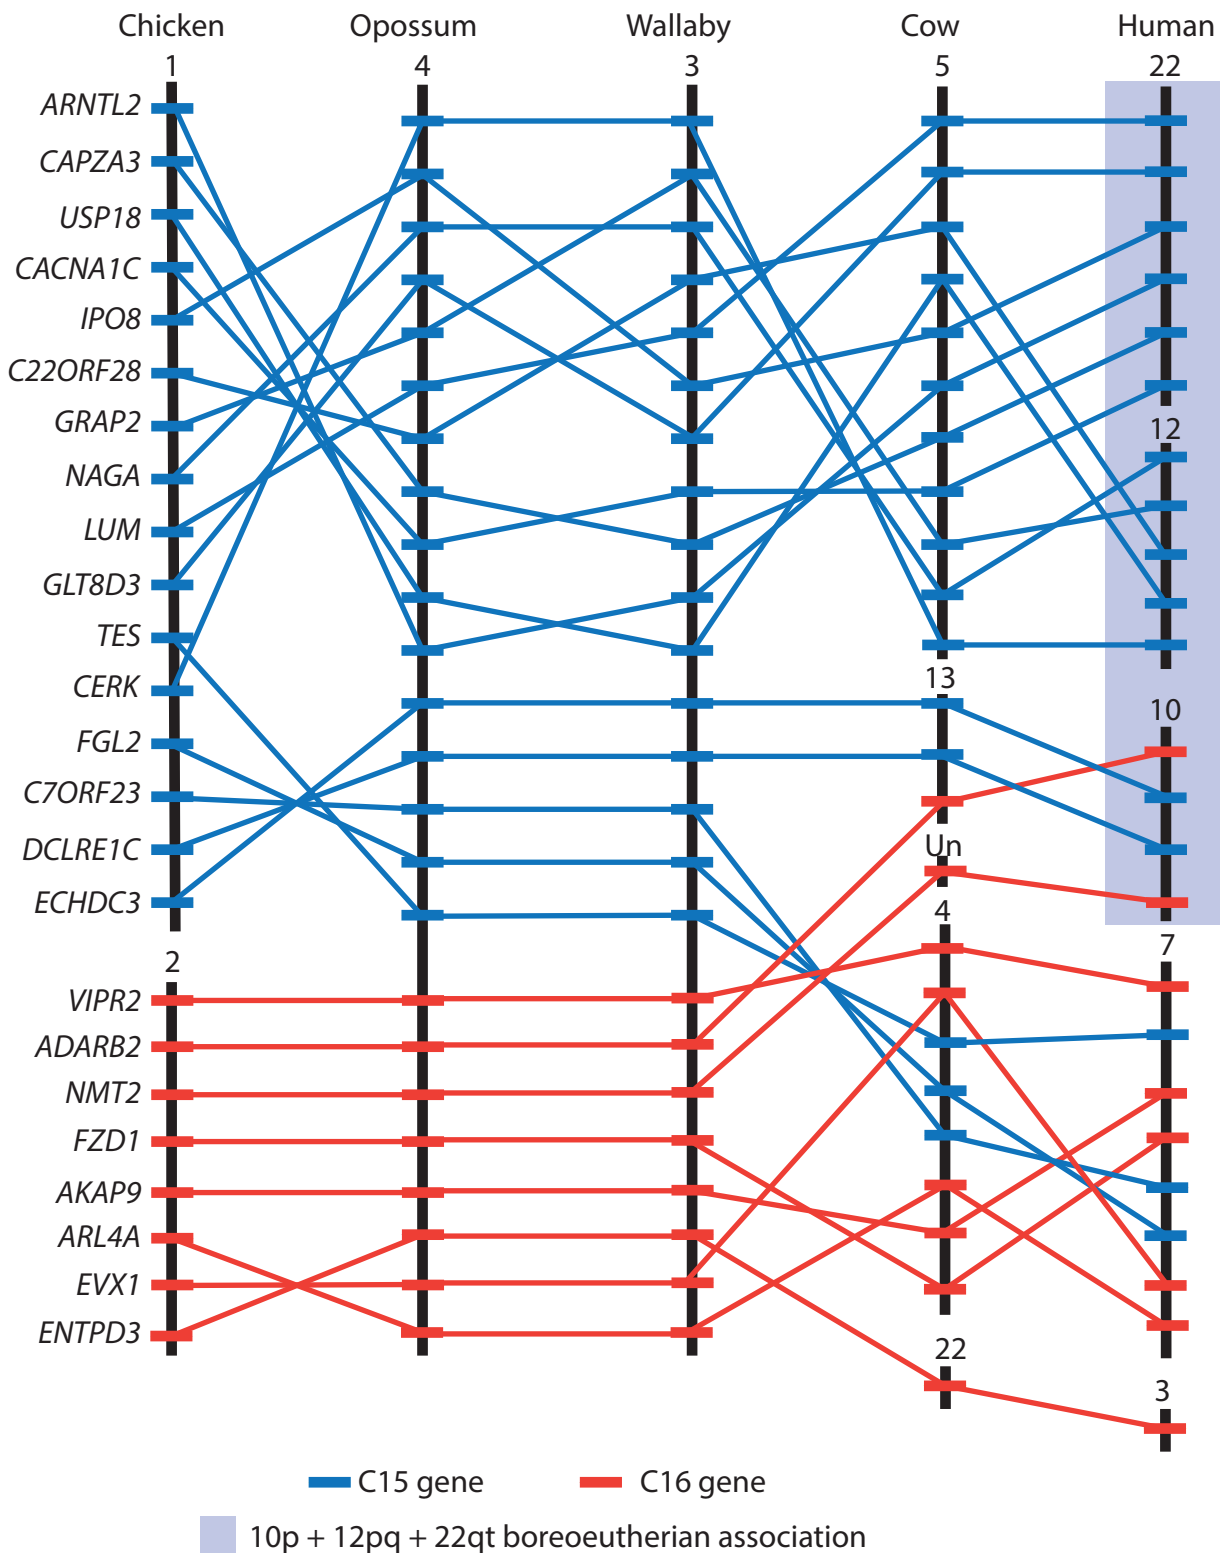

Supplement: 1471-2148-13-258-S5.pdf [file 1471-2148-13-258-S5.pdf]
